# Supplementary material for: Metabolic Profile of Skimmianine in Rats Determined by Ultra-Performance Liquid Chromatography Coupled with Quadrupole Time-of-Flight Tandem Mass Spectrometry
Source: MDPI journal article supplement (doi:10.3390/molecules22040489), 2017-03-23
Supplement: s1 [file s1]

Supplementary material

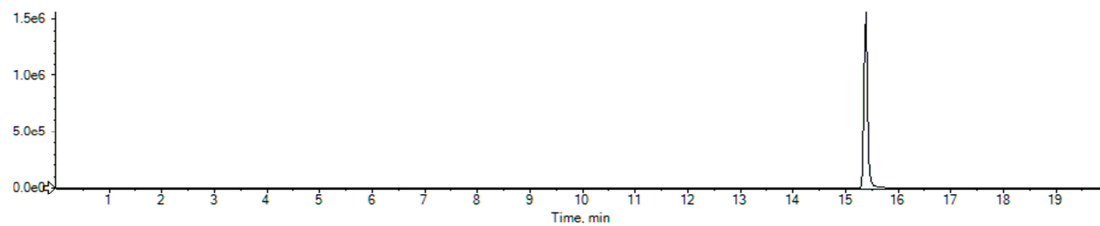

**Figure S1.** Extracted ion chromatograms of skimmianine standard

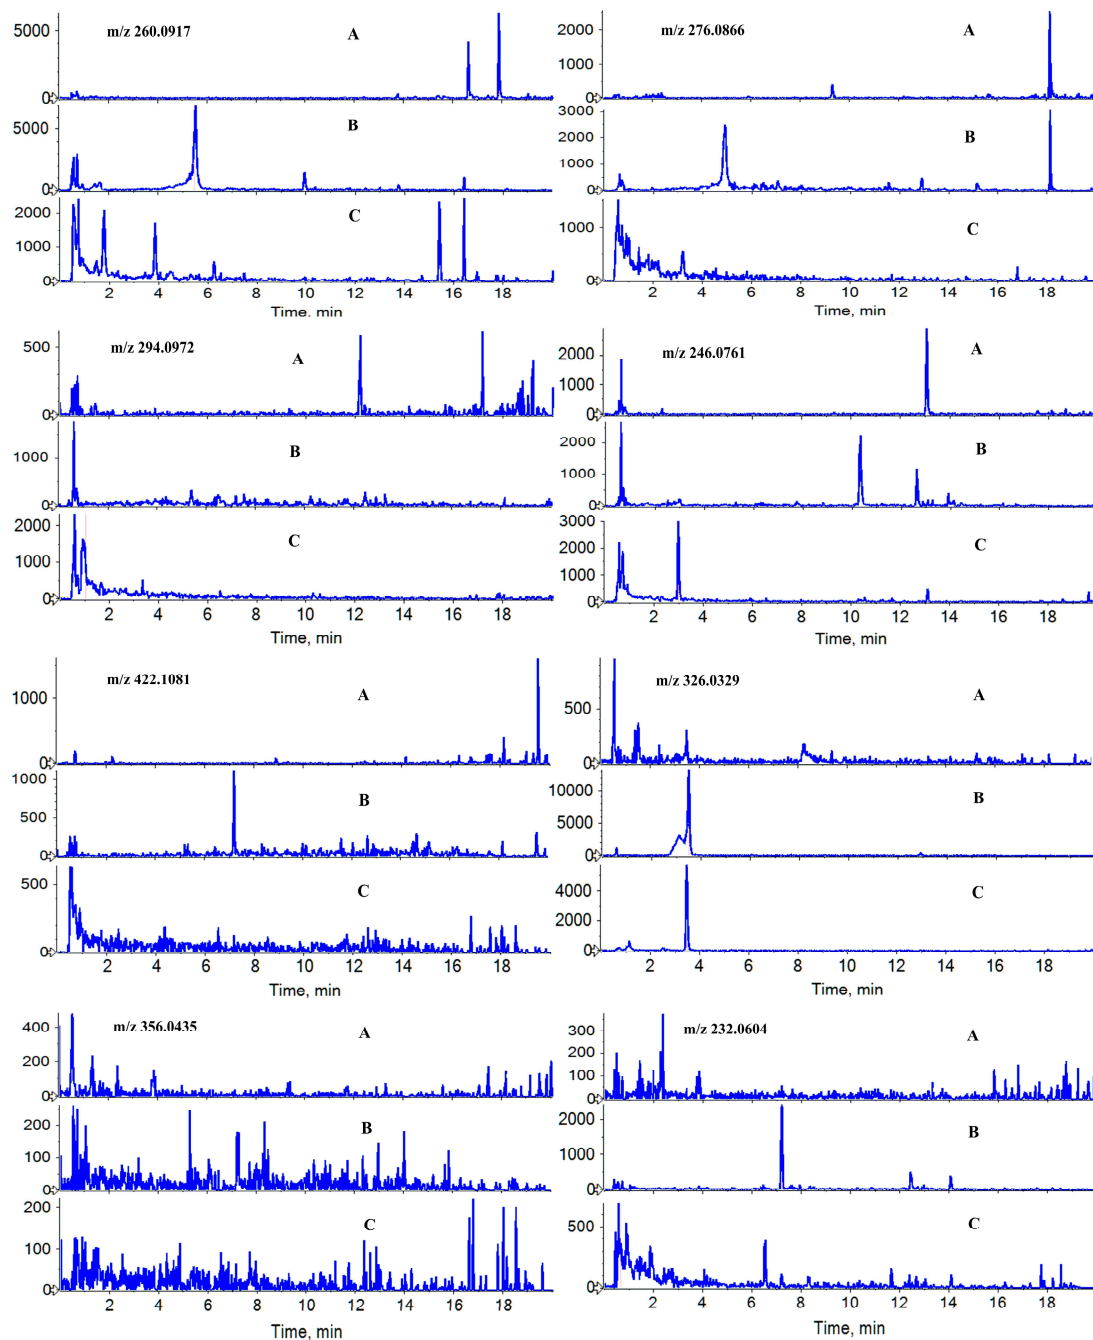

**Figure S2.** Extracted ion chromatograms of skimmianine and its metabolites in rats: A, blank plasma sample; B, blank urine sample; C, blank feces sample.

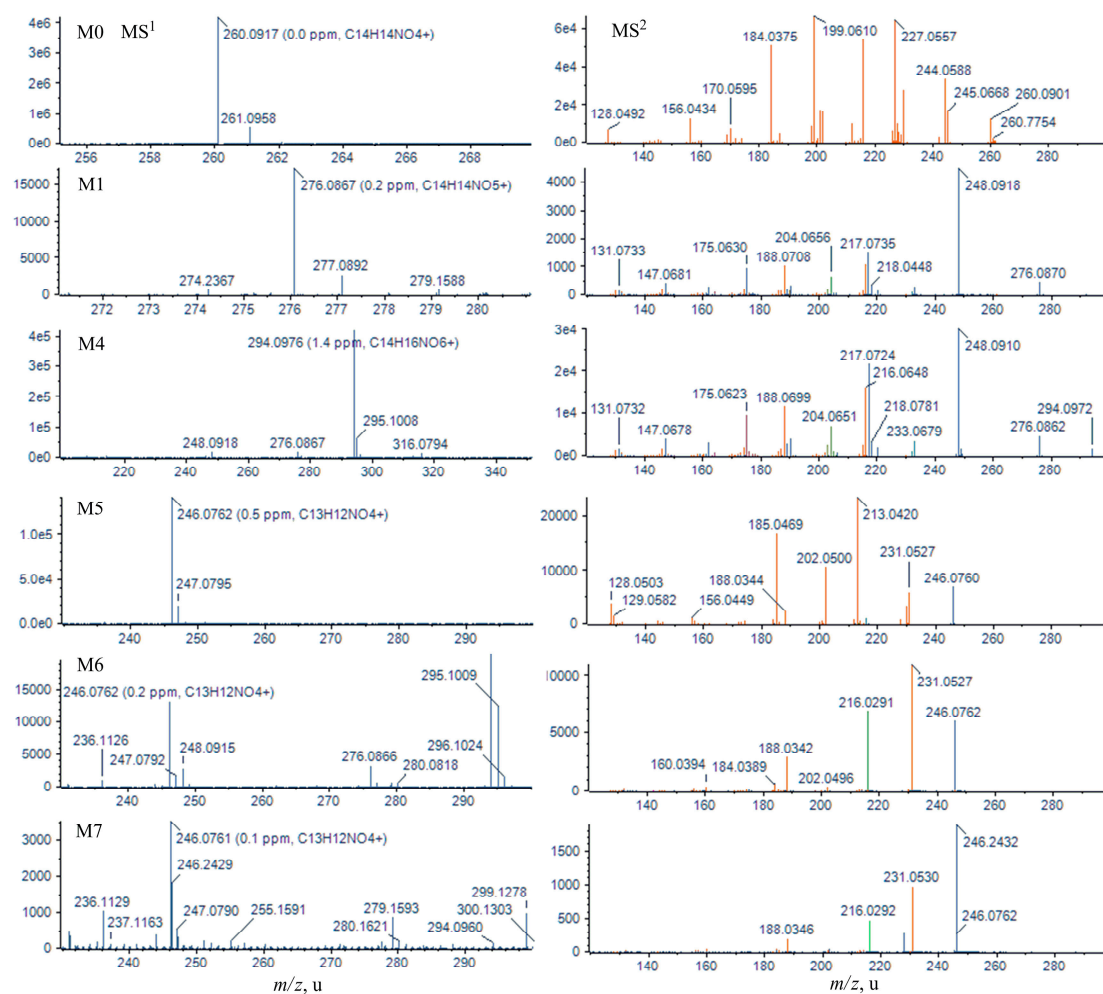

**Figure S3.** MS<sup>1</sup> and MS<sup>2</sup> spectra of parental drug and its metabolites identified in rat plasma samples.

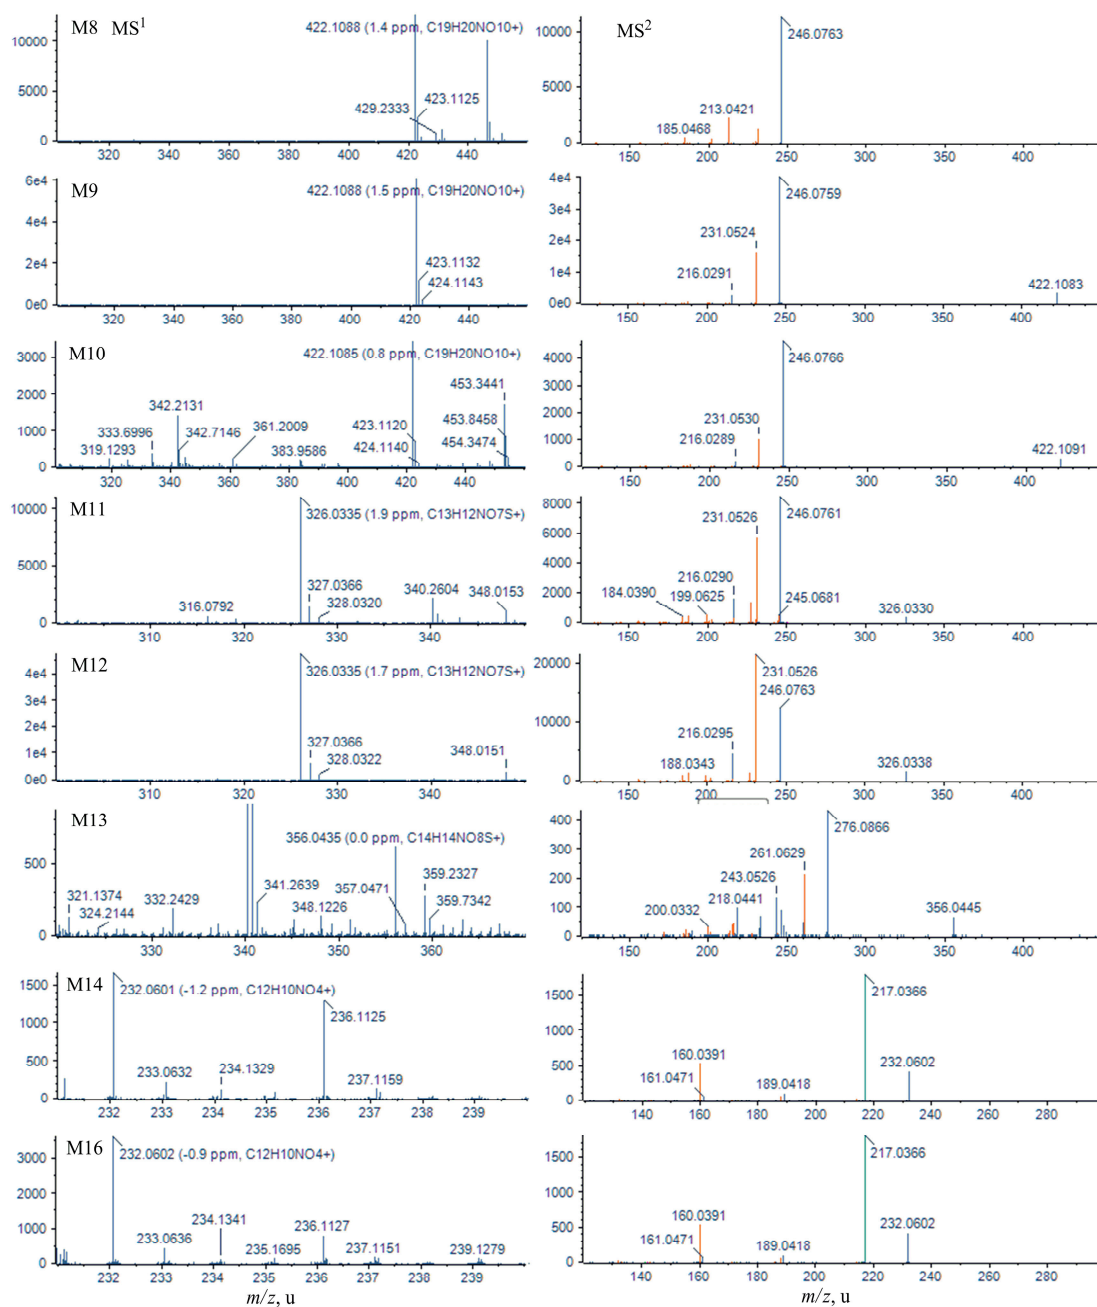

Figure S3. Continued

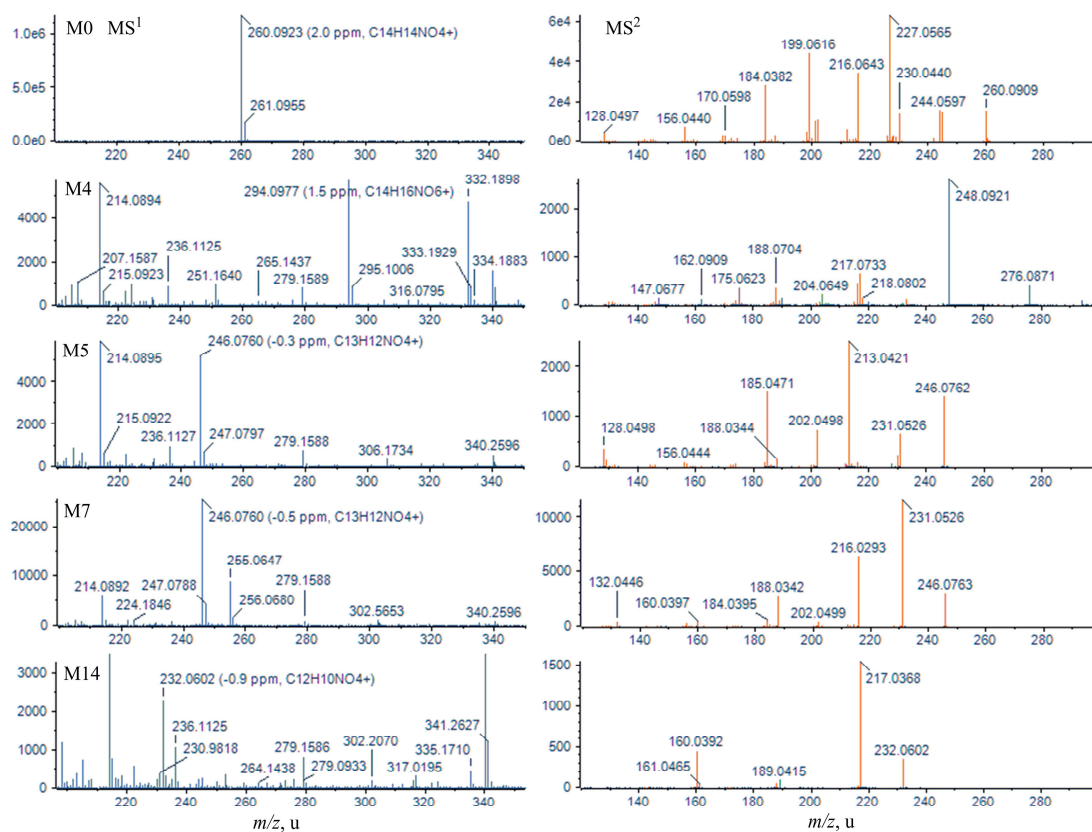

**Figure S4.** MS<sup>1</sup> and MS<sup>2</sup>spectra of parental drug and its metabolites identified in rat feces samples.
